# Supplementary material for: Efficacy and toxicity of Ipilimumab-Nivolumab combination therapy in elderly metastatic melanoma patients
Source: PubMed Central journal article supplement (PMC9676931; doi:10.3389/fonc.2022.1020058), 2022-11-07
Supplement: DataSheet_1.pdf [file DataSheet_1.pdf]

## Appendix – response rates

*Table S1 - Response patterns in all patients*

| Response n (%) | Group A (n=26) | Group B (n=32) |
|----------------|----------------|----------------|
| ORR            | 10 (38%)       | 18 (56%)       |
| PR             | 6 (23%)        | 8 (25%)        |
| CR             | 4 (15%)        | 10 (31%)       |
| SD             | 3 (12%)        | 1 (3%)         |
| PD             | 13 (50%)       | 13 (41%)       |

Abbreviations: ORR – overall response rate; PR – partial response; CR – complete response; SD – stable disease; PD – progression of disease

*Table S2 - Response patterns in cutaneous Melanoma*

| Response n (%) | Group A (n=14) | Group B (n=24) |
|----------------|----------------|----------------|
| ORR            | 4 (29%)        | 16 (67%)       |
| PR             | 2 (14%)        | 6 (25%)        |
| CR             | 2 (14%)        | 10 (42%)       |
| SD             | 2 (14%)        | 0 (0%)         |
| PD             | 8 (57%)        | 8 (33%)        |

Abbreviations: ORR – overall response rate; PR – partial response; CR – complete response; SD – stable disease; PD – progression of disease

*Table S3 - Response patterns in non-cutaneous Melanoma*

| Response n (%) | Group A (n=12) | Group B (n=8) |
|----------------|----------------|---------------|
| ORR            | 6 (50%)        | 2 (25%)       |
| PR             | 4 (33%)        | 2 (25%)       |
| CR             | 2 (17%)        | 0 (0%)        |
| SD             | 1 (8%)         | 1 (12.5%)     |
| PD             | 5 (42%)        | 5 (62.5%)     |

Abbreviations: ORR – overall response rate; PR – partial response; CR – complete response; SD – stable disease; PD – progression of disease

Table S4 - Response rate according to age subgroups

| Subgroup age (n) | Response rate n (%) |           |
|------------------|---------------------|-----------|
| >80 (8)          | 3 (37.5%)           | p=NS      |
| 75-79 (18)       | 7 (39%)             | reference |
| 65-74 (12)       | 7 (58%)             | p=NS      |
| <65 (20)         | 11 (55%)            | reference |

Abbreviations: NS=nonsignificant
